# Supplementary material for: Wind regimes during the Last Glacial Maximum and early Holocene: evidence from Little Llangothlin Lagoon, New England Tableland, eastern Australia
Source: Copernicus journal article supplement (doi:10.5194/cp-2016-41), 2016-04-06
Supplement: Supplementary file 1 [file cp-2016-41-supplement.pdf]

1 **Supplementary Information Figure Legends**

2 **Figure S1.** Results of the preheat plateau test on single aliquots of the Lake Little Llangothlin  
3 sample L-EVA1231 (field code LL4). There does not appear to be a dependence of equivalent  
4 dose with preheat temperature, although more inter-aliquot scatter was observed for the preheat  
5 temperature of 280°C. Therefore a higher preheat temperature (260°C) was chosen for  
6 subsequent SAR measurements; the cutheat temperature was 220°C.

7 **Figure S2.** Dose recovery test results for L-EVA1228, illustrated as a radial plot. The black line  
8 corresponds to the administered dose and the shaded line to  $2\sigma$  on either side of the central age.

9 **Table S1.** Results of the Finite Mixture Modelling. The dominant age populations used for age  
10 calculation are highlighted in italics.

11

12 **Supporting Information Legends (File S1)**

13 **Table S1.** Overdispersion values based on dose distributions from the LLL OSL samples.

| <b>Sample code</b> | <b>Overdispersion (%)</b> |
|--------------------|---------------------------|
| L-EVA1228<br>(LL1) | 79.9                      |
| L-EVA1229<br>(LL2) | 44.4                      |
| L-EVA1230<br>(LL3) | 63.9                      |
| L-EVA123<br>(LL4)  | 61.4                      |

14

15

16 **Table S2.** Results from the Finite Mixture Modelling. The dominant age populations used for  
 17 age calculation are highlighted in italics; the resulting ages for the dominant and second major  
 18 age populations are also given for comparison.

| <b>Sample code</b> | <b>Number of components</b> | <b>De (Gy)</b>                                   | <b>% population</b>                 | <b>Age (ka)</b>                                          | <b>BIC</b> |
|--------------------|-----------------------------|--------------------------------------------------|-------------------------------------|----------------------------------------------------------|------------|
| L-EVA1228<br>(LL1) | 4                           | 1.4±0.1<br>2.8±0.3<br><i>6.1±0.6</i><br>13.4±1.6 | 22.4<br>28.7<br><i>32.5</i><br>16.5 | 1.2 ± 0.1<br>2.3 ± 0.3<br><i>5.1 ± 0.5</i><br>11.1 ± 1.6 | 155        |
| L-EVA1229<br>(LL2) | 2                           | 5.7±0.3<br><i>19.2±0.4</i>                       | 12.8<br><i>87.2</i>                 | 5.6 ± 0.5<br><i>18.9 ± 1.2</i>                           | 101        |
| L-EVA1230<br>(LL3) | 3                           | 4.5±0.3<br>11.8±0.5<br><i>26.9±0.9</i>           | 12.2<br>39.0<br><i>48.8</i>         | 9.1 ± 0.7<br><i>20.6 ± 1.4</i>                           | 234        |
| L-EVA1231<br>(LL4) | 2                           | 7.8±0.5<br><i>22.9±1.2</i>                       | 43.2<br><i>56.8</i>                 | 8.0 ± 0.7<br><i>23.4 ± 1.8</i>                           | 128        |

19

20

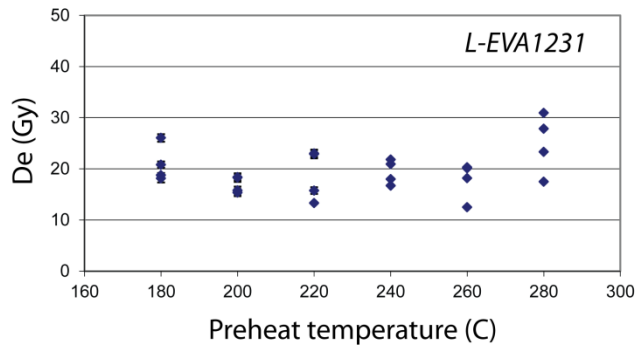

21

22 **Figure S1.** Results of the preheat plateau test on single aliquots of the Lake Little Llangothlin  
23 sample L-EVA1231 (field code LL4). There does not appear to be a dependence of equivalent  
24 dose with preheat temperature, although more inter-aliquot scatter was observed for the preheat  
25 temperature of 280°C. Therefore a higher preheat temperature (260°C) was chosen for  
26 subsequent SAR measurements; the cutheat temperature was 220°C.

27

28

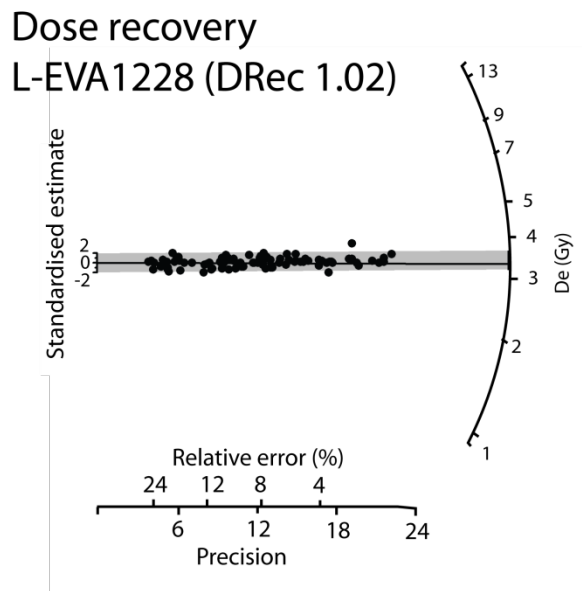

29

30 **Figure S2.** Dose recovery test results for L-EVA1228, illustrated as a radial plot. The black line  
31 corresponds to the administered dose and the shaded line to 2σ on either side of the central age.

32

33

34 Supplementary Information - References

35

36 Botter-Jensen, L., Bulur, E., Duller, G.A.T., Murray, A.S., 2000. Advances in luminescence  
37 instrument systems. *Radiation Measurements* 32, 523-528.

38 Bowler, J.M., 1968. Australian landform example no.11: lunette. *Australian Geographer* 10, 402-  
39 404.

40 Bowler, J.M., 1973. Clay dunes: their occurrence, formation and environmental significance.  
41 *Earth Science Reviews* 9, 315-338.

42 Bowler, J.M., 1983. Lunettes as indices of hydrologic change: A review of the Australian  
43 evidence. *Proceedings of the Royal Society of Victoria* 95, 147-168.

44 Fitzsimmons, K.E., Stern, N., Murray-Wallace, C.V., 2014. Depositional history and  
45 archaeology of the central Lake Mungo lunette, Willandra Lakes, southeast Australia. *Journal of*  
46 *Archaeological Science* 41, 349-364.

47 Murray, A.S., Wintle, A.G., 2000. Luminescence dating of quartz using an improved single-  
48 aliquot regenerative-dose protocol. *Radiation Measurements* 32, 57-73.

49 Murray, A.S., Wintle, A.G., 2003. The single aliquot regenerative dose protocol: potential for  
50 improvements in reliability. *Radiation Measurements* 37, 377-381.

51 Prescott, J.R., Hutton, J.T., 1994. Cosmic ray contributions to dose rates for luminescence and  
52 ESR dating: Large depths and long term variations. *Radiation Measurements* 23, 497-500.

53

54
