# Supplementary material for: Wind regimes during the Last Glacial Maximum and early Holocene: evidence from Little Llangothlin Lagoon, New England Tableland, eastern Australia
Source: Copernicus journal article supplement (doi:10.5194/cp-2016-41), 2016-04-06
Supplement: Supplementary file [file cp-2016-41-AC1-supplement.pdf]

1 **Constant wWind regimes during the Last Glacial Maximum and early**

Formatted: Font: Times New Roman

2 **Holocene: evidence from Little Llangothlin Lagoon, New England Tableland,**  
3 **eastern Australia**

4  
5 **James Shulmeister\***

6 School of Geography, Planning and Environmental Management, University of Queensland, St  
7 Lucia 4072 Queensland, Australia

8 \* Corresponding author: Ph +61 7 334 61644. Email: james.shulmeister@uq.edu.au

9 **Justine Kemp**

10 Australian Rivers Institute, Griffith University, Nathan 4111 Queensland, Australia

11 **Kathryn E. Fitzsimmons \***

12 Department of Human Evolution, Max Planck Institute for Evolutionary Anthropology,  
13 Deutscher Platz 6, D-04103 Leipzig, Germany

14 **Allen Gontz#**

Formatted: Font: Times New Roman

15 School for the Environment, University of Massachusetts-Boston, Boston MA 02125, USA

16 #Current Address: Department of Geological Sciences, San Diego State University, San Diego, CA

17 92182, USA

Formatted: Font: Times New Roman

18  
19 **Abstract**

Formatted: Font: Times New Roman

20  
21 Here we present the results of a multi-proxy investigation, integrating geomorphology, ground  
22 penetrating radar and luminescence dating, of a high elevation lunette and beach berm in  
23 northern New South Wales, eastern Australia. The lunette occurs on the eastern shore of Little  
24 Llangothlin Lagoon and provides evidence for a lake high stand combined with persistent  
25 westerly winds at the Last Glacial Maximum (LGM - centering on 21.5 ka) and during the early  
26 Holocene (c. 9 and 6 ka). The reconstructed atmospheric circulation is similar to the present-day  
27 conditions and we infer no significant changes in circulation at those times, as compared to the  
28 present day. Our results suggest that the Southern Hemisphere westerlies were minimally  
29 displaced in this sector of Australasia during the latter part of the last ice age. Our observations

30 also support evidence for a more positive water balance at the LGM and early Holocene in this  
31 part of the Australian sub-tropics.

32

### 33 **Keywords**

34 Westerlies, last glacial maximum (LGM), lunette, aeolian, lake levels, palaeolimnology,  
35 palaeohydrology, ground penetrating radar (GPR), optically stimulated luminescence (OSL)

36

### 37 **1 Introduction**

38

39 The temperate latitude westerly wind system influences the southern half of the Australian  
40 continent, and ~~influences~~dictates not only this region's climate but also the formation and  
41 response of its landscape systems. It plays an important role in the delivery of winter rainfall to  
42 the southern half of Australia. Understanding the history of the westerlies in the Australasian  
43 region is therefore important for understanding the climate and environmental history of eastern  
44 Australia (Shulmeister et al., 2004; Fletcher and Moreno, 2012; Lorrey et al., 2012). In addition,  
45 changes in the southern hemisphere westerlies are inferred to modulate global atmospheric  
46 carbon dioxide concentrations and potentially trigger global climate changes (e.g. Denton et al.,  
47 2010).

48

49 Here we investigate past wind regime changes in eastern Australia as reflected in the shoreline  
50 marginal landforms of the Little Llangothlin Lagoon (LLL). LLL is a presently shallow lake  
51 which sits at 30 °S (30° 5' 9"S, 151° 46' 53"E) in northern New South Wales. It lies close to the  
52 present day northern boundary of the winter westerlies, therefore providing an excellent  
53 opportunity to investigate long-term changes in prevailing wind direction and intensity. The  
54 lagoon has a lunette (transverse shoreline dune) on its eastern shoreline and a possible beach  
55 berm on its south-eastern margin. These landforms reflect aeolian and wave-driven transport and  
56 deposition of sediments, and consequently provide indicators for the orientation of prevailing  
57 wind directions and intensity at the time of sediment deposition (Bowler, 1968; Bowler, 1973,  
58 1983). In this study we undertook luminescence dating, combined with geomorphic and

Formatted: Font: Times New Roman

Formatted: Font: Times New Roman

59 stratigraphic investigations, to reconstruct past periods of westerly, and possible north-westerly,  
60 prevailing wind flow in this region.

61  
62 The endorheic LLL basin was formed in gently undulating tableland comprising Tertiary basalt  
63 flows at approximately 1300 m above mean sea level (AMSL). The western shoreline of LLL is  
64 dominated by a low ridge of basalt, which rises 30 m above the lake (~~see Fig 1~~Figure 1). On the  
65 eastern side of the basin, the lake is bound by a low hill of granite that forms part of the New  
66 England Batholith (Shaw and Flood, 1981). The Lagoon covers an area of 1.2 km<sup>2</sup> and has a  
67 catchment of 3.2 km<sup>2</sup>. LLL is a shallow, roughly circular permanent lake with a maximum depth  
68 of 2 m that shallows during droughts, which in this part of Australia are often associated with El  
69 Nino years. As far as we can determine, the lake has never dried out fully in post-European  
70 settlement times (Woodward et al., 2014b). Another, smaller, lake (Billy Bung Lagoon) lies c.  
71 500 m to the southwest of LLL and is separated from the main lake by the low basalt ridge.

72  
73  
74 The origin of the New England 'lagoons' is cryptic. Conraeds (1989) showed that they were  
75 associated with former drainage lines that were occupied by basalt flows. He suggested that  
76 uneven infilling of former valleys by basalt during the Tertiary produced shallow depressions  
77 where the shallow lakes and swamps, locally called 'lagoons', formed. Similar lakes have been  
78 described elsewhere along the tablelands of the Great Dividing Range and Ollier (1979)  
79 suggested a tectonic origin for these features, proposing that uplift of the Eastern Highlands  
80 caused back tilting on many streams. Other authors such as Bell et al. (2008) have suggested a  
81 deflationary origin, where intense weathering occurred as a result of wetting and drying of the  
82 basalt. The mechanisms are not incompatible and deflation may have enhanced and maintained  
83 the basins, which were created by back-tilting.

84  
85 Many of these upland lakes have lunettes on their eastern margins (*sensu* Bowler 1976). These  
86 are transverse crescentic ridges dominated by wave action and shoreline drift, with coarse  
87 textured wave-built ridges on downwind margins (Bowler, 1986). Their regular outline reflects  
88 the influence of strong wave action, while the aeolian deflation of sands from the beach forms

89 foreshore dunes with an orientation ~~equivalent to~~consistent with the winter wind resultant vector  
90 (Bowler, 1971). The proportion of clay and silt in lunettes increases during periods of shoreline  
91 regression, and is derived from efflorescence and pelletisation of saline lacustrine sediments on  
92 the drying lake floor. Salt concentration\* in upland lakes tends to be weaker~~low~~ owing to  
93 groundwater seepage, restricting the preparation of pelletal clays for deflation and producing  
94 dominantly sandy lunettes.

Formatted: Font: Times New Roman

Formatted: Font: Times New Roman

95  
96 The catchment is fed by summer rainfall (mean annual rainfall = 880 mm) and has a theoretical  
97 net annual moisture balance deficit of c. 400 mm (Woodward et al., 2014a). The regional  
98 vegetation is dominated by montane open eucalypt woodland, while the lagoon itself contains  
99 extensive beds of tall spike rush *Eleocharis sphacelata* and the water plant *Potamogeton*  
100 *tricarinatus* in the deeper parts of the basin. Other swamp plants, including *Carex*  
101 *glaudichaudiana*, are dominant in the surrounding wet margins of the lagoon.

Formatted: Font: Times New Roman

102  
103 The lagoon has been intensively investigated from a palaeoecological and environmental  
104 viewpoint because it is a major bird reserve as well as a Ramsar wetland. Furthermore, the site  
105 has been identified as a location of exceptional soil erosion since European settlement (Gale et  
106 al., 1995; Gale and Haworth, 2005), although this has recently been challenged (Woodward et  
107 al., 2011). The site has more recently become a focus for work due to inferred changes to basin  
108 hydrology in response to tree clearance during European settlement of the New England  
109 Tablelands (Woodward et al., 2014a). There has also been some investigation of the  
110 archaeological history of the lagoon suggesting that landscapes such as these provided relatively  
111 rich resources for Aboriginal people, and that New England lagoons became the foci for  
112 ceremonial activities, although the degree to which hydrological conditions influenced human  
113 activity remains poorly understood since chronological control for the pre-European period has  
114 so far been lacking (Beck et al., 2015).

115  
116 This paper examines the geomorphic context of shoreline features on the western and southern  
117 margins of the lagoon and focuses on the history of lake-margin sediment deposition to  
118 reconstruct the climatic circulation from the last glacial maximum (LGM) into the Holocene.

119

## 120 **2 Materials and Methods**

121

### 122 *2.1 Field investigations*

123

124 Transects across an apparent beach berm and the lunette were surveyed using a MALA ProEx  
125 ground penetrating radar (GPR) system with a 500 MHz antenna and integrated high-resolution  
126 GPS. The GPR data were collected in transects forming a rough grid parallel and perpendicular  
127 to the trend of hypothesised beach and lunette landforms. The GPR was hand-dragged at a  
128 speed of ~ 4 kph and fired using time firing at a rate of 10 Hz resulting in an average along-track  
129 resolution of 0.11 m and 0.07 m vertical resolution, based on a center frequency of 500 MHz.  
130 After acquisition, radar data were processed using GPR Slice software (DC drift; user-defined  
131 signal gain; bandpass lo=350 MHz, hi=650 MHz; background removal). Profiles were  
132 topographically corrected using elevation data from the GPS system and spot-checked using  
133 known elevations. While absolute topography was not reliable, relative elevation was  
134 consistently reproducible. Individual profiles were converted to depth-distance using the  
135 published radar velocity for wet sands of 0.07 m/ns in the beach ridges and dry sands 0.12 m/ns  
136 in the lunette (Neal, 2004). Depth-distance profiles were used to evaluate sediment thickness and  
137 observe true geometry of radar reflectors.

Formatted: Font: Times New Roman

138

139 The sub-surface sediments were logged using a hand auger to a depth of between 0.6 m and 1.2  
140 m, depending on sub-surface conditions. Sub-samples were collected for grain size analyses. In  
141 addition, gravels from the sand and gravel barrier were treated with HCl for 12 hours in order to  
142 identify weathering products such as manganese-iron pisoliths. Four samples were collected for  
143 optically stimulated luminescence (OSL) dating using steel tubes, wrapped in black plastic, and  
144 transported to the Max Planck Institute for Evolutionary Anthropology in Leipzig for analysis.

Formatted: Font: Times New Roman, 12 pt

Formatted: Font: Times New Roman

145

### 146 *2.2 OSL dating - Equivalent dose measurements*

147 Sample preparation and measurement for OSL dating was undertaken in the luminescence dating  
148 laboratory of the Department of Human Evolution, Max Planck Institute for Evolutionary

149 Anthropology in Leipzig. The OSL samples were prepared under subdued red light using  
150 published methods (Fitzsimmons et al., 2014). This involved sieving, applying ~~treatments-HCl~~  
151 acid and hydrogen peroxide digestion to remove carbonates and organic matter respectively, and  
152 isolating pure, 180-212 µm quartz grains. The outer ~10 µm alpha-irradiated rind of each grain  
153 was removed by etching in hydrofluoric acid, and the sample was then subjected to a final sieve  
154 to remove finer fragments which had broken off during etching. The quartz grains were then  
155 prepared as small aliquots (18 discs; 1 mm diameter) for preheat testing and as single grains (600  
156 grains; 6 single grain discs) for equivalent dose ( $D_e$ ) measurement.

Formatted: Font: Times New Roman

Formatted: Font: Times New Roman

157  
158  $D_e$  measurements were undertaken using an automated Risø TL-DA-15 equipped with blue light-  
159 emitting diodes (for preheat and initial dose estimate testing), and a TL-DA-20 reader with a  
160 single grain attachment containing a green laser emitting at 532 nm, for light stimulation of  
161 single aliquots and single grains respectively (Botter-Jensen et al., 2000). Irradiation was  
162 provided by calibrated  $^{90}\text{Sr}/^{90}\text{Y}$  beta sources. Equivalent doses were determined on single grains  
163 using the single aliquot regenerative dose (SAR) protocol of Murray and Wintle (2000; 2003).  
164 Preheat temperatures of 260°C were chosen based on the results of the preheat plateau tests  
165 (Figure S2+) for the natural and regenerative doses, with a preheat temperature of 220°C for the  
166 test doses (0.94 Gy).

167  
168 Individual grains were analysed for their suitability for OSL dating based on the selection criteria  
169 of Jacobs and Roberts (2007). The single grain dose distributions of all samples are >40%  
170 overdispersed with complex dose populations (Table S1), and therefore the Finite Mixture Model  
171 (FMM) was used to identify dose populations (Galbraith and Green, 1990). The OSL dating  
172 results are summarised in Table 1. Equivalent dose distributions for the four samples are shown  
173 as radial plots, with the FMM-derived dose populations highlighted, in Figure 3-S34.

Formatted: Font: Times New Roman, Not Highlight

Formatted: Font: Times New Roman

### 175 2.3 OSL dating - Dose rate calculations

176 Uranium, thorium and potassium ( $^{40}\text{K}$ ) activities were measured in the “Felsenkeller” laboratory  
177 at VKTA Rossendorf in Dresden, Germany, using low-level gamma-ray spectrometry. Dose  
178 rates were calculated using the conversion factors of Stokes et al. (2003) with  $\beta$ -attenuation

179 factors taken from Mejdahl (1979). Beta counting was based on 1 g homogenized subsamples  
180 and used for the beta component of the dose rate. Measured water contents ranged from 5-10%  
181 and these values were used for all samples. Cosmic dose rates were calculated from Prescott and  
182 Hutton (1994).

Formatted: Font: Times New Roman

Formatted: Font: Times New Roman

### 184 **3 Results**

#### 186 *3.1 Geomorphology*

187 There are no dune or beach deposits on the western side of the lake (Figure 1). The main  
188 geomorphic feature on the eastern side of the lake is ~~a the lunette small dune system~~ and the low  
189 basalt ridge. The ~~dunefield-lunette~~ comprises a north-south oriented ridge less than 2 m high  
190 adjacent to the lake, a swale behind that is occupied by a small stream and a small sand flat area  
191 that extends up to 50 m east of the lake shore.

192  
193 The lunette on the eastern shore is composed of poorly sorted medium sand grading upwards into  
194 fine sand with accessory silt contents of 3-15%. Particle size results and other stratigraphic  
195 information are plotted on Figure 1 ~~and particle size analysis curves are provided as~~  
196 Supplementary Figure 1. GPR transects are shown in Figures 2a and 2b.

197  
198 On the SE margin of LLL, there is a partly infilled outlet, immediately to the west of which is a  
199 c. 100 m long, 50 m wide low (< 1m) berm. The berm is poorly to well sorted, medium and  
200 coarse quartz rich sand with iron-manganese, pisolithic gravel and a silt content of 1-14%.

#### 202 *3.2 GPR results*

203  
204 The GPR proved effective at mapping stratigraphic architecture and subsurface character to a  
205 depth shallower than 4 m in the berm (Figures 2a and 2b). GPR data suggest the presence of  
206 several distinct units related to changes in lake level and the development of spit/barrier and  
207 berm formations (Shan et al., 2015; Thompson et al., 2011). The berm showed strong internal  
208 stratification ~~on and features~~ perpendicular lines with strong sigmoidal clinofolds indicating

209 beach progradation to the west (Thompson et al., 2011) as well as low-angle sub-parallel  
210 reflectors dipping to the east suggesting basin infill via over wash processes. This package is  
211 underlain by a convex-up package of reflections that are sub-parallel with dips to the east and  
212 west. ~~Comparision~~Comparison of this feature with those identified by Shan and others (2015)  
213 suggest the complex in underlain by a spit complex. Additional information on the character of  
214 the lower units associated with the interpreted spit are unavailable due to the existing GPR data  
215 coverage.

216  
217 The internal stratigraphy of the fine-grained lunette was difficult to assess with the GPR.  
218 Evidence of extensive modern bioturbation by rabbits was observed during the radar acquisition.  
219 The shallow penetration did however show weak internal characteristics commonly associated  
220 with lunette formation (Thomas and Burrough, in press). These included eastward dipping high  
221 angle reflectors that are truncated on the western facing slope, coupled with areas of parallel to  
222 sub-parallel reflections that change to steeply dipping reflections. All reflectors are laterally  
223 discontinuous and show evidence of disturbance at all depths observed, rendering the GPR data  
224 ineffective at determining genetic processes or detailed landform characteristics.

225  
226 *3.3 OSL results*

227  
228 The OSL age data are summarised in Table 1, and shown with respect to stratigraphy and  
229 catchment geomorphology in Fig 1. The three samples collected from three different locations  
230 along the lunette suggest that the entire landform was ~~formed~~active during the LGM, between c.  
231 24-19 ka. Our samples do not extend to the base of aeolian sedimentation and it is likely that the  
232 lunette was formed earlier than the LGM. The secondary age populations identified by FMM are  
233 all younger than the ~~LGM~~main phase of deposition (Figure ~~3~~3; ~~Table S2-S32~~) and suggest phases  
234 of partial reactivation or pedogenic infiltration of material into the lunette. The younger age  
235 populations from sites LL3 and LL4 in the central part of the lunette are comparable and strongly  
236 suggest contemporaneous post-depositional infiltration of younger material or partial reactivation  
237 of the lunette in the early Holocene (c. 9-8 ka; Table S2). Sample L-EVA 1230 (LL3) exhibits a  
238 third peak centred on 11.8 Gy (9.1 ka). The second major age population from the LL2 site in

Formatted: Font: Times New Roman, Not Highlight

Formatted: Font: Times New Roman



239 the southern part of the lunette dates to the mid-Holocene ( $5.6 \pm 0.5$  ka; Table S2) and suggests  
240 spatial and temporal variability in the Holocene post-depositional pedogenesis (or reactivation)  
241 of the lunette.

242  
243 The overdispersion on individual  $D_e$  results from the berm was too high (79.9%; Table S1) to  
244 reliably define a depositional age, although the largest age population yields a mid-Holocene age  
245 ( $5.1 \pm 0.5$  ka; Table 1) comparable with the reactivation of the southern part of the lunette at  
246 LL2. The minor dose populations yield ages of  $11.1 \pm 1.6$  ka,  $2.3 \pm 0.3$  ka and  $1.2 \pm 0.1$  ka  
247 (Table S2).

248

#### 249 **4 Discussion**

250

251 There are two separate but related sets of geomorphic features recorded along the eastern and  
252 south-eastern margin of LLL. These are the sand and gravel berm which is a lake beach/spit  
253 feature and the lunette which is an Aeolian feature but tied to the shoreline. Both are supplied  
254 with sediment by wind wave processes in the lake but the former is a sub-aqueous feature, while  
255 the lunette is an Aeolian structure.

256

##### 257 *4.1 A possible spit/barrier berm on the SE corner of the lagoon*

258

259 The most cryptic landform in the basin is the ~~barrier sand and gravel berm feature~~ on the SE  
260 margins of LLL. The feature was identified by Gale et al. (2005), who interpreted it as part of a  
261 relict older lunette feature. From visual observations alone, this is a reasonable interpretation  
262 because the low berm does look like the erosional shadow of an older ridge. Our sedimentologic  
263 and GPR structural investigations, however, discount this interpretation. Based on both GPR and  
264 field observations from pits, the feature is clearly a beach berm, with numerous small wash-over  
265 structures (see Fig. 2a).

266

267 The berm barrier feature is composed of pea-sized gravels with a finer sandy matrix. We  
268 assume the sandy matrix to be post-depositional because it is incompatible with the sedimentary

Formatted: Indent: Left: 0 cm

Formatted: Font: Times New Roman, Not Bold

Formatted: Font: Times New Roman

Formatted: Font: Times New Roman, Not Bold

Formatted: Font: Times New Roman

269 structures and post-depositional infilling of openwork deposits is common. In addition, the  
270 contrast between locally sourced detrital basalt gravels and reworked quartz-rich sand and silt is  
271 striking. The matrix may have accumulated either through aeolian accession, or through  
272 filtration of sands through the barrier during high lake stands when the berm would have acted as  
273 a permeable filter for the lake. Given the mostly coarse nature of the matrix (medium to coarse  
274 sand), we prefer the two-stage filtration hypothesis.

275  
276 The pea-sized gravels are detrital. We suggest that the most likely origin for this feature is as a  
277 spit that developed from the basalt ridge on the SW edge of the lake, and that the basalt gravels  
278 were moved along the shoreline by longshore drift. The barrier ultimately cut off an area to the  
279 SW of the present lake that was part of a larger, ancestral lake feature, for which we have no age  
280 constraint due to the lack of associated sedimentary deposits. The barrier post-dates the LGM as  
281 we have been provided with a radiocarbon result (R. Haworth pers comm 2016) from a depth of  
282 1.5 m close to our LLL sample (Beta-110588 16,200 ± 70 yr BP: median 19500 cal yr BP:  
283 calibration from Stuiver and Reimer, 1993 (Calib 7.1) with a Southern Hemisphere correction  
284 (SHCal13) from Hogg et al., 2013) that provides a maximum age for the barrier. The  
285 luminescence sample based on the finer matrix material at 0.5 m depth yielded a highly dispersed  
286 dose distribution with four age populations, which is not unexpected given our hypothesis that  
287 the matrix is post-depositional. The grains may represent the accretion of fines to the barrier  
288 during high stands in the lake in the early (c. 11 ka), mid (c. 5.6 ka) and late Holocene (c. 2.3 ka,  
289 1.2 ka).

290

#### 291 *4.2 Aeolian history of LLL from the lunette*

292

293 Based on the morphology, sedimentary composition and internal structure, the feature along the  
294 eastern shoreline of LLL is clearly a composite beach and aeolian landform. The quartz-rich  
295 sands were most likely derived from the granites on the eastern side of the catchment, which  
296 deposited into the lake and were subsequently reworked onto the shoreline. ~~Curiously, even~~  
297 ~~though~~ ~~h~~Half the basin is comprised of basalt, yet there is little evidence for basalt-derived  
298 sediments in the lunette system. By contrast, the fine sediments in the depocentre of the lake

Formatted: Font: Times New Roman

Formatted: Font: Times New Roman

299 basin are primarily derived from basalt (~~e.g. Woodward et al., 2011~~). This implies that there is an  
300 effective sorting mechanism within the basin, ~~whereby: The basalt preferentially weathers to~~  
301 ~~mud while the granite generates sand. Current sorting by currents would move~~transport the  
302 ~~finer~~ fines to the depocentre while the sands would be ~~moved~~transported towards the lake margins.  
303 The ~~obvious-most parsimonious~~ candidate for this ~~latter~~ process is wind-blown waves.

304  
305 Present day wind roses for LLL (BOM, 2014) demonstrate that there are two primary wind  
306 directions (Figure 4), one from the east and the other from the west to north-west. These  
307 prevailing winds have strong seasonal components. Winter winds (August) are dominated by  
308 westerlies and provide the strongest and most persistent flows (8% calm) consistent with  
309 eastward transport and deposition of sediments onto a lunette situated on the eastern shoreline of  
310 LLL. Summer winds (February) are dominated by easterlies associated with onshore circulation  
311 on the northern limb of the sub-tropical high pressure cell in summer (Fig. 4). These easterly  
312 winds are on average weaker (20% calm) but do include short periods of relatively high intensity  
313 winds, which might be expected to result in sediment transport to, and deposition onto, the  
314 western side of the lake. It is curious therefore that all depositional landforms marginal to LLL  
315 are located on the east and south-east sides of the lake, with no deposition on the western  
316 shoreline. ~~Examination of the wind roses indicates that sand transporting winds (above ~22 kmh:~~  
317 ~~Fryberger, 1979) was more than twice as frequent (~14% versus ~5%) in August than in~~  
318 ~~February, and that the highest wind speeds occurred more frequently in August. This indicates~~  
319 ~~confirms~~ that the most effective net sand-transporting wind, associated with lunette and berm  
320 formation, was from the west/north-west. The transport is most likely to have been primarily  
321 sub-aqueous, since the relatively poor sorting in the foredune indicates only ~~intermittent-a short-~~  
322 ~~distance~~ aeolian transport ~~pathway, at least of the coarsest component.~~

323  
324 ~~One obvious question is why the westerlies are so strongly recorded in the LLL lunette, and not~~  
325 ~~the easterlies. This partly reflects the greater frequency of high wind speeds from the west, but~~  
326 ~~on its own it is unlikely to explain the entire phenomenon. In addition to the stronger drift~~  
327 ~~potential there may also be a biological effect also. The most parsimonious answer integrates the~~  
328 ~~sedimentary information with seasonal variations in the biological system. The rush beds~~

329 occurring in the shallower parts of the lake are most fully developed during the summer. Unlike  
330 much of Australia, winters are severe on the New England Tablelands due to the relatively high  
331 elevations, and seasonal die-back of the ~~jointed-wire-tall spike~~ rush is ~~also~~ observed today. New  
332 growth emerges in spring and dies off in autumn in cooler, high altitude sites (Rajapakse et al.,  
333 2006). Consequently, the summer peak in vegetation cover disrupts the wind fetch over the lake  
334 precisely at the same time as the easterly winds penetrate the tablelands, thereby further reducing  
335 the ability for waves to set up during the warmer months.

336  
337 The luminescence ages from the lunette are coherent; ~~a~~ ~~All three~~ samples are dominated by  
338 grains that are LGM in age. The samples all overlap at  $2\sigma$  and produce a weighted mean age of  
339  $20.4 \pm 0.8$  ka ~~mean age of 21.5 ka~~, indicating that the main phase of dune activity at LLL occurred  
340 during the late LGM. Our interpretation that the dominant sediment transport mechanism was  
341 subaqueous therefore implies that the LGM oversaw permanent, and probably full, lake  
342 conditions at LLL. Evidence from ~~our unpublished pollen records and~~ sedimentary archives  
343 from the depocentre of the lake ~~support the concept support our hypothesis of~~ for a full lake  
344 during the late LGM (c. 19 ka). Specifically, the lake sediments from this time interval are an  
345 unoxidised grey clay, which contains numerous sponge spicules. In addition, pollen records from  
346 these latitudes suggest the survival of rainforest at lower elevations to the east through the LGM  
347 (e.g. Moss et al., 2013), indicating persistence of moisture availability. Our argument for the  
348 persistence, and perhaps intensification, of winter westerlies throughout the LGM at LLL is also  
349 confirmed by observations made at North Stradbroke Island some 300 km to the north-northeast  
350 of our site (Petherick et al., 2009; McGowan et al. 2009). North Stradbroke Island lies at the very  
351 northern edge of the westerlies zone, and the accession of fine aeolian material into a dune lake  
352 there indicates that the winter westerlies were operative at the LGM in South East Queensland at  
353  $27.20^\circ\text{S}$  (Petherick et al., 2009; McGowan et al. 2009), just as the westerlies operate today in this  
354 region.

355  
356 A secondary peak in grain ages is observed ~~from in~~ all three lunette samples. This peak is less  
357 well defined but in all three cases relates to the early to mid-Holocene between 9 and 6 ka. Work  
358 from the lake (Woodward et al., 2011) has already demonstrated that the early Holocene was the

Formatted: Font: Times New Roman

359 last phase, before the modern anthropogenically modified lake, with lake full conditions as  
360 represented by extensive *Eleocharis* beds. Wind waves would ~~We~~ have been effective on the  
361 lake and we infer partial reactivation of the lunette at ~~this~~this times.

362  
363 We note a third grain age peak in one lunette sample (EVA1230) at c. 3 ka. This is both the  
364 weakest individual age peak and not replicated at any other site. It is possible that this represents  
365 a dune re-activation event, bioturbation, or even Aaboriginal usage of the site which has been  
366 proposed to have intensified during the late Holocene (post 4300 yr; Beck et al., 2015). At this  
367 stage this event, if real, is still poorly controlled chronologically and we do not interpret it  
368 further.

369  
370 Overall, our evidence demonstrates that at the LGM, winter westerly winds were strong enough  
371 to form the eastern shoreline lunette in a single phase, with possible later reactivation during the  
372 early Holocene. Critically, foredune activation depends as much on high water levels in the lake  
373 allowing the wave delivery of sediment to the eastern beach as it does on sand mobilizing winds  
374 (Bowler, 1983). During the Pleistocene, elevations above 800 m in the region were subject to  
375 extensive, active development of block deposits, screes, and solifluction lobes, indicating winter  
376 cooling of at least 10.5 °C relative to present (Slee and Shulmeister, 2015). Reduced evaporation  
377 due to lower temperatures (e.g. Hesse et al., 2003) and transfer of flow from  
378 throughflow/baseflow to overland flow due to increased snow cover (Reinfelds et al., 2014) at  
379 this time is likely to have been sufficient to cause the change to a positive hydrological balance  
380 in the lake.

381  
382 For the intervening periods, at least in the Holocene, the evidence (Woodward et al., 2014a)  
383 suggests that water levels were lower and/or even that the lake was ephemeral. It is highly  
384 unlikely that sand would be transported to the high stand beach during low lake levels. If the  
385 entire basin floor fully dried out, pelletised clays might be expected, and yet none are observed.  
386 There are two likely reasons for this. Firstly, this high elevation site is unlikely to become very  
387 arid even during relatively dry phases when swampy conditions probably persisted on the basin  
388 floor. Similarly, it is unlikely that salt formation is significant in this setting and clay

Formatted: Font: Times New Roman

Formatted: Font: Times New Roman

389 pelletisation may not occur. This is similar to observations from Lake George, which also ~~occurs~~  
390 lies within a cool temperate climate setting along the Great Dividing Range (Fitzsimmons and  
391 Barrows, 2010).

392  
393 In summary, these records strongly suggest that for the two intervals recorded (the LGM and  
394 early Holocene), the overall circulation conditions at LLL were very similar to the present day.  
395 This region presently lies near the northern limit of westerly penetration in winter. Westerlies  
396 ~~occurred during both the early Holocene and the LGM suggesting that at both time intervals the~~  
397 position of the westerly jet lay near 30°S, which is its modern track. For the intervening periods,  
398 absence of evidence is not evidence of absence, and if the winter westerly winds lay at this  
399 latitude during peak warming in the early Holocene and during the LGM, it seems reasonable to  
400 suppose that this track has been persistent over the last 25 ky.

401  
402 The track of the Australian winter westerlies during the LGM has been a source of contention for  
403 some time, with both poleward and equatorward changes argued for (e.g. Harrison and Dodson,  
404 1993; Hesse, 1994; Shulmeister et al., 2004). One possibility is that the westerly lay north of its  
405 current track during the LGM and that the timing of the westerlies at LLL shifted seasonally. A  
406 northward shift of ~3° (350 km) in the position of the westerly wind belt during MIS 2 was  
407 recorded in sediments from marine cores in the Tasman Sea (Hesse, 1994). Analysis of the  
408 aeolian component of lake sediments on North Stradbroke Island at 27 °S for the period 25-22 ka  
409 indicates dust sources in the SW Murray-Darling Basin, with a secondary component from  
410 WNW of the site (Petherick et al. 2009). These findings are consistent with either no change or  
411 is lends support to a possible northward shift in the westerlies but are not consistent with the  
412 poleward contraction of the westerlies in eastern Australia at the LGM.

413  
414 **Conclusions**  
415  
416 This study indicates that westerly winds ~~construeactivateded~~ a foredune ridge lunette at LLL  
417 during the LGM under the influence of high lake levels. This ridge was reactivated during high  
418 lake stands in the early to mid-Holocene. The persistence of westerly winds at this site during the

419 LGM confirms observations from North Stradbroke Island at the northern limits of penetration of  
420 the temperate latitude westerlies. This suggests that the overall circulation pattern in this part of  
421 eastern Australia, at the modern northern limits of westerly winter flow, remained constant  
422 during both the LGM and the early Holocene. Overall, this points to minimal change in  
423 circulation patterns over the last 25 ky.

424

#### 425 **Team List**

426 James Shulmeister

427 Justine Kemp

428 Kathryn Fitzsimmons

429 Allen Gontz

430

#### 431 **Copyright Statement**

432

433 Except where explicitly acknowledged the authors hold the copyright of the materials presented.

434

#### 435 **Author Contributions**

436 J Shulmeister lead the project, assisted with field sampling for OSL and grain size and lead the  
437 manuscript development. J Kemp assisted in the field with OSL sample acquisition, conducted  
438 grain size analysis and participated in manuscript development. K Fitzsimmons **oversaw**  
439 **undertook** the OSL sample analysis and participated in manuscript development. A Gontz lead  
440 the GPR acquisition and processing, assisted with OSL sampling and manuscript development.

441

#### 442 **Acknowledgements**

443 This research was funded by an Australian Research Council Discovery Grant DP110103081,  
444 “The last glaciation maximum climate conundrum and environmental responses of the Australian  
445 continent to altered climate states”. We thank S. Hesse for assistance with OSL sample  
446 preparation. R. Haworth made a radiocarbon age from underneath the sand and gravel berm  
447 available to us. C. Woodward, J. Chang, and A. Slee assisted with fieldwork. We thank all the

Formatted: Font: Times New Roman, German (Germany)

Formatted: Font: Times New Roman

Formatted: Font: Times New Roman

Formatted: Font: Times New Roman

448 [referees for very helpful input that has improved the paper.](#) We thank NSW Parks and Wildlife  
449 Service for access to the site and the local farmers for retrieving our vehicle from the bottomless  
450 suck hole!

Formatted: Font: Times New Roman

451

## 452 References

453 Bell, D.M., Hunter, J.T., and Haworth, R.J.: Montane lakes (lagoons) of the New England  
454 tablelands bioregion, *Cunninghamia*, 10, 475-492, 2008.

455 Beck, W., Haworth, R., and Appleton, J.: Aboriginal resources change through time in New  
456 England upland wetlands, south-east Australia, *Archaeol Ocean*. 50, 47-57, 2015.

Formatted: Font: (Default) Times New Roman

457 Botter-Jensen, L., Bulur, E., Duller, G.A.T., and Murray, A.S.: Advances in luminescence  
458 instrument systems, *Radiat Meas*, 32, 523-528, 2000.

459 Bowler, J.M.: Aridity in Australia: age, origins and expression in aeolian landforms and  
460 sediments, *Earth Sci Rev*, 12, 279-310, 1976.

461 Bureau of Meteorology. Summary statistics Guyra Hospital. Climate Data Online. 2014.  
462 Available at: [http://www.bom.gov.au/climate/averages/tables/cw\\_056229.shtml](http://www.bom.gov.au/climate/averages/tables/cw_056229.shtml). Last accessed.  
463 29 February, 2016.

Formatted: Font: (Default) Times New Roman

Formatted: Font: (Default) Times New Roman

464 Coenraads, R.R.: Evaluation of the natural lagoons of the Central Province, NSW—Are they  
465 sapphire-producing maars?, *Explor Geophys*, 20, 347-363, 1989.

466 [Denton, G.H., Anderson, R.F., Toggweiler, J.R., Edwards, R.L., Schaefer, J.M., Putnam, A.E.:  
467 The last glacial termination. \*Science\*, 328 \(5986\):1652-6. doi: 10.1126/science.1184119, 2010.](#)

468 Fitzsimmons, K.E., and Barrows, T.T.: Holocene hydrologic variability in temperate  
469 southeastern Australia: An example from Lake George, New South Wales, *The Holocene* 20,  
470 585-59, 2010.

471 Fitzsimmons, K.E., Stern, N., and Murray-Wallace, C.V.: Depositional history and archaeology  
472 of the central Lake Mungo lunette, Willandra Lakes, southeast Australia, *J Archaeol Sci* 41, 349-  
473 364, 2014.

474 [Folk, R.L. \*Petrology of Sedimentary Rocks\*, Hemphill, Austin, 1974.](#)

Formatted: Font: Times New Roman, 12 pt

Formatted: Font: (Default) Times New Roman

475

476 Fletcher, M.S., and Moreno, P.I.: Have the Southern Westerlies changed in a zonally symmetric  
477 manner over the last 14,000 years? A hemisphere-wide take on a controversial problem,  
478 *Quaternary Int*, 253, 32-46, 2012.



479

480 [Fryberger, S.G.: Dune forms and wind regime. In: A study of global sand seas. McKee, E.D.](#)  
481 [\(Ed\) Gov print office, Washington, USA, 137-160, 1979.](#)

482 Galbraith, R.F., and Green, P.F.: Estimating the component ages in a finite mixture, Nucl Tracks  
483 Rad Meas 17, 197-206, 1990.

484 Gale, S.J., Haworth, R.J., and Pisanu, P.C.: The 210 Pb chronology of late Holocene deposition  
485 in an eastern Australian lake basin, Quaternary Sci Rev, 14, 395-408, 1995.

486 Gale, S.J., and Haworth, R.J.: Catchment-wide soil loss from pre-agricultural times to the  
487 present: transport-and supply-limitation of erosion. Geomorphology, 68, 314-33, 2005.

488 Haworth, R.J., Gale, S.J., Short, S.A., and Heijnis, H.: Land use and lake sedimentation on the  
489 New England tablelands of New South Wales, Australia, Aust Geogr, 30, 51-73, 1999.

490 [Harrison, S.P., and Dodson, J.R.: Climates of Australia and New Guinea since 18,000 yr B.P. In:](#)  
491 [Wright Jr., H.E., Kutzbach, J.E., Webb III, T., Ruddiman, W.F., Street-Perrot, F.A., Bartlein, P.J.](#)  
492 [\(Eds.\), Global Climates Since the Last Glacial Maximum. University of Minnesota Press,](#)  
493 [Minneapolis, MN, 265-293, 1993.](#)

494 Hesse, P.P.: The record of continental dust from Australia in Tasman Sea sediments, Quaternary  
495 Sci Rev, 13, 257-72, 1994.

496 [Hesse, P.P., Humphreys, G.S., Selkirk, P.M., Adamson, D.A., Gore, D.B., Nobes, D.C., Price,](#)  
497 [D.M., Schwenninger, J-L., Smith, B., Tulau, M., Hemmings, F.: Late Quaternary aeolian dunes](#)  
498 [on the presently humid Blue Mountains, Eastern Australia, Quat Int, 108, 13-32, 2003.](#)

499 [Hogg, A.G., Hua, Q., Blackwell, P.G., Buck, C.E., Guilderson, T.P., Heaton, T.J., Niu, M.,](#)  
500 [Palmer, J.G., Reimer, P.J., Reimer, R.W., Turney, C.S.M., Zimmerman, S.R.H.,](#)  
501 [Radiocarbon, 55, DOI: 10.2458/azu\\_js\\_rc.55.16783, 2013.](#)

502 Jacobs, Z., and Roberts, R.G.: Advances in optically stimulated luminescence dating of  
503 individual grains of quartz from archeological deposits, Evol Anthropol, 16, 210-223, 2007.

504 Lorrey, A.M., Vandergoes, M., Almond, P., Renwick, J., Stephens, T., Bostock, H., Mackintosh,  
505 A., Newnham, R., Williams, P.W., Ackerley, D., and Neil, H.: Palaeocirculation across New  
506 Zealand during the last glacial maximum at ~21 ka, Quaternary Sci Rev, 36, 189-213, 2012.

507 McGowan, H.A., Petherick, L.M., and Kamber, B.S.: Aeolian sedimentation and climate  
508 variability during the late Quaternary in southeast Queensland, Australia, Palaeogeog, Palaeocl,  
509 265, 171-81, 2008.

Formatted: Font: (Default) Times New Roman

Formatted: Font: (Default) Times New Roman

510 Mejdahl, V.: Thermoluminescence dating: beta-dose attenuation in quartz grains, *Archaeometry*  
511 21, 61-72, 1979.

512 [Moss, P.T., Tibby, J., Petherick, L., McGowan, H. and Barr, C.: Late Quaternary vegetation](#)  
513 [history of North Stradbroke Island, Queensland, eastern Australia, \*Quaternary Sci Rev\*, 74, 257-](#)  
514 [272, 2013.](#)

515 Murray, A.S., and Wintle, A.G.: Luminescence dating of quartz using an improved single-aliquot  
516 regenerative-dose protocol, *Radiat Meas*, 32, 57-73, 2000.

517 Murray, A.S., and Wintle, A.G.: 2003. The single aliquot regenerative dose protocol: potential  
518 for improvements in reliability, *Radiat Meas*, 37, 377-381, 2003.

519 Neal, A.: Ground penetrating radar and its use in sedimentology: principles, problems and  
520 progress, *Earth Sci Rev*, 66, 261-330, 2004.

521 Ollier, C.D.: Evolutionary Geomorphology of Australia and Papua: New Guinea, *T I Brit Geog*,  
522 4, 516-39, 1979.

523 Petherick, L.M., McGowan, H.A., and Kamber, B.S.: Reconstructing transport pathways for late  
524 Quaternary dust from eastern Australia using the composition of trace elements of long traveled  
525 dusts, *Geomorphology*, 105, 67-79, 2009.

526 Prescott, J.R., and Hutton, J.T.: Cosmic ray contributions to dose rates for luminescence and  
527 ESR dating: Large depths and long term variations, *Radiat Meas*, 23, 497-500, 1994.

528 Rajapakse L., Asaeda, T., Williams, D., Roberts, J., and Manatunge, J.: Effects of water depth  
529 and litter accumulation on morpho-ecological adaptations of *Eleocharis sphacelata*, *Chem Ecol*,  
530 22, 47-57, 2006.

531 [Reinfelds, I., Swanson, E., Cohen, T., Larsen, J., and Nolan, A.: Hydrosatial assessment of](#)  
532 [streamflow yields and effects of climate change: Snowy Mountains, Australia, \*Jour Hydrol\*, 512,](#)  
533 [206-220, 2014.](#)

534 Shan, X., Yu, X., Clift, P.D., Tan, C., Jin, L., Li, M, and Li, W.: The ground penetrating radar  
535 facies and architecture of a paleo-spit from Huangqihai Lake, North China: implications for  
536 genesis and evolution, *Sediment Geol*, 323, 1-14, 2015.

537 Shaw, S.E., and Flood, R.H.: The New England Batholith, eastern Australia: geochemical  
538 variations in time and space, *J Geophys Res-Sol Ea*, 86, 10530-10544, 1981.

539 Shulmeister, J., Goodwin, I., Renwick, J., Harle, K., Armand, L., McGlone, M.S., Cook, E.,  
540 Dodson, J., Hesse, P.P., Mayewski, P., and Curran, M.: The Southern Hemisphere westerlies in  
541 the Australasian sector over the last glacial cycle: a synthesis, *Quaternary Int*, 118, 23-53, 2004.

542 Slee, A., and Shulmeister, J.: The distribution and climatic implications of periglacial landforms  
543 in eastern Australia, *J Quaternary Sci*, 30, 848-58, 2015.

544 Stokes, S., Ingram, S., Aitken, M.J., Sirocko, F., Anderson, R., and Leuschner, D.: 2003.  
545 Alternative chronologies for Late Quaternary (Last Interglacial–Holocene) deep sea sediments  
546 via optical dating of silt-sized quartz, *Quaternary Sci Rev*, 22, 925-941, 2003.

547 [Stuiver, M., and Reimer, P.J., \*Radiocarbon\*, 35, 215-230, 1993.](#)

Formatted: Font: (Default) Times New Roman

548 Thomas, D.S.G., and Burrough, S.L.: Luminescence-based chronologies in southern Africa:  
549 analysis and interpretation of dune database records across the subcontinent, *Quaternary Int*, 1-  
550 16, in press.

551 Thompson, T.A., Lepper, K., Endres, A.L., Johnston, J.W., Baedke, S.J., Argyilan, E.P., Booth,  
552 R.K., and Wilcox, D.A.: Mid Holocene lake levels and shoreline behaviour during the Nipissing  
553 phase of the upper Great Lakes at Alpena, Michigan, USA, *J Great Lake Res*, 37, 567-576, 2011.

554 Woodward, C., Chang, J., Zawadzki, A., Shulmeister, J., Haworth, R., Collecutt, S., and  
555 Jacobsen, G.: Evidence against early nineteenth century major European induced environmental  
556 impacts by illegal settlers in the New England Tablelands, south eastern Australia, *Quaternary  
557 Sci Rev*, 30, 3743-3747, 2011.

558 Woodward, C., Shulmeister, J., Bell, D., Haworth, R., Jacobsen, G., and Zawadzki, A.: A  
559 Holocene record of climate and hydrological changes from Little Llangothlin Lagoon, south  
560 eastern Australia, *The Holocene*, 6:0959683614551218, 2014a.

561 Woodward, C., Shulmeister, J., Larsen, J., Jacobsen, G.E., and Zawadzki, A.: The hydrological  
562 legacy of deforestation on global wetlands, *Science*, 346, 844-7, 2014b.

563

564

565 **Tables**

566 **Table 1.** Equivalent dose ( $D_e$ ), dose rate data and OSL age estimates for Lake Little Llangothlin.

567 Dose rates are listed as attenuated based on published factors (Stokes et al. 2003; Mejdahl 1979).

| Sample           | $D_e$ (Gy) | K (%)     | Th (ppm) | U (ppm) | Beta dose rate (Gy/ka) | Cosmic dose rate (Gy/ka) | Water content (%) | Total dose rate (Gy/ka) | Age (ka) |
|------------------|------------|-----------|----------|---------|------------------------|--------------------------|-------------------|-------------------------|----------|
| L-EVA 1228 (LL1) | 6.1±0.6    | 0.53±0.02 | 4.0±0.2  | 1.3±0.1 | 0.6±0.1                | 0.19±0.02                | 10±3              | 1.21±0.07               | 5.1±0.5  |
| L-EVA 1229 (LL2) | 19.2±0.4   | 0.34±0.02 | 3.5±0.2  | 1.3±0.1 | 0.5±0.1                | 0.18±0.02                | 5±3               | 1.02±0.06               | 18.9±1.2 |
| L-EVA 1230 (LL3) | 26.9±0.9   | 0.69±0.04 | 3.0±0.1  | 1.3±0.1 | 0.7±0.1                | 0.18±0.02                | 7±3               | 1.30±0.08               | 20.6±1.4 |
| L-EVA 1231 (LL4) | 22.9±1.1   | 0.56±0.02 | 2.7±0.1  | 0.7±0.1 | 0.5±0.1                | 0.18±0.02                | 6±3               | 0.98±0.05               | 23.4±1.8 |

568

569

570 **Figure Legends**

571 **Figure 1.** Geomorphology and sediments at Little Llangothlin Lagoon (30° 5' 9"S, 151° 46'  
572 53"E), 18 km NE Guyra, NSW, showing the locations of GPR transects, sediment cores (right)  
573 and the position of OSL samples.

574 **Figure 2a.** GPR transects over the "berm". See Fig 1. for location of transect. GPR line A7 was  
575 acquired perpendicular to the shoreline starting just lakeward of the highest point on the berm.  
576 Internal structures are characteristic of an interfingering beach-washover-basin fill sequence over  
577 a spit complex. Upper panel, raw data; lower panel, interpretation.

578 **Figure 2b.** GPR line A9 was acquired from the lake shore to the highest point on the berm.  
579 Internal structures show characteristics of a beach environment over a spit complex. Top left  
580 panel, raw data; top right panel, interpretation. The lower panel shows a conceptual model based  
581 on composite GPR profiles suggesting a lower lake facies with spit facies underlying beach,  
582 washover and basin fill facies.

583 **Figure 3.** Equivalent dose distributions for the LLL samples, illustrated as radial plots. The  
584 shaded populations in each case represent the dominant age peaks; the lines illustrate the other  
585 identified populations.

586 **Figure 4.** Rose of 9am wind direction vs wind speed in km/hr at Guyra Hospital, 1332 m AMSL  
587 (Bureau of Meterology, 2014). Only winds above ~22 kph are sand carrying (based on the 12  
588 knot threshold of Fryberger, 1979). Sand drift potential is much stronger in winter (August) than  
589 it is in summer (February) because the relationship is a power function of the wind speed and  
590 frequency of very strong winds is much lower in summer.

591

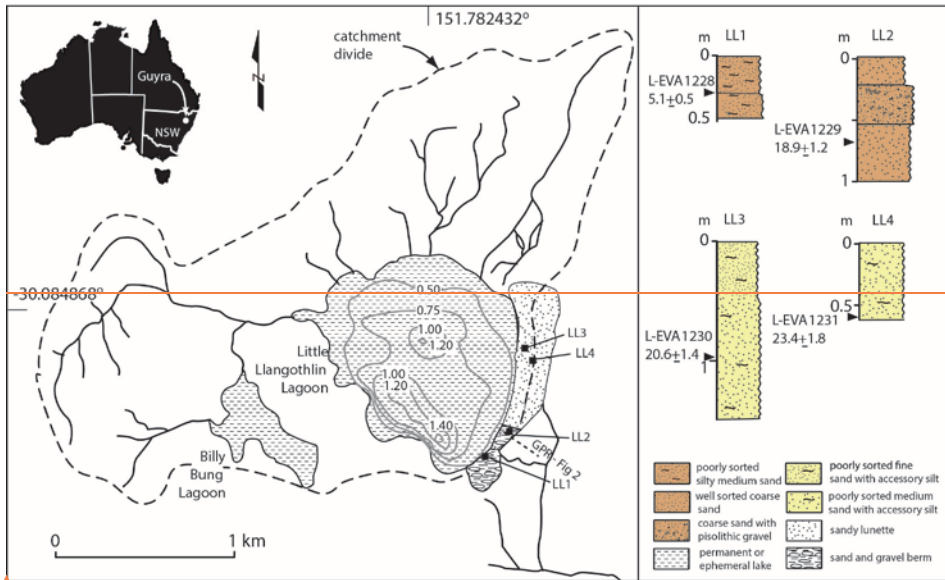

592

Formatted: Font: Times New Roman

Formatted: Font: Times New Roman

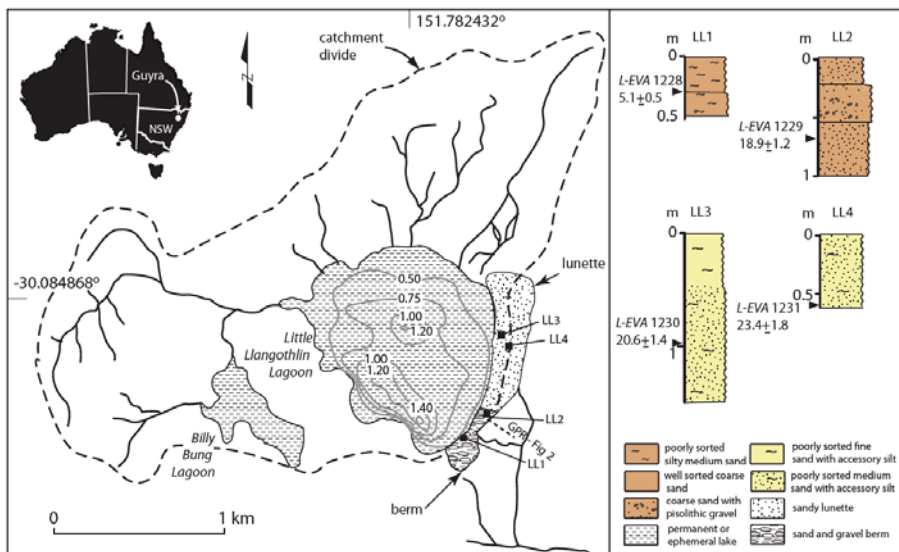

593

594 **Figure 1**

Formatted: Font: Times New Roman

595

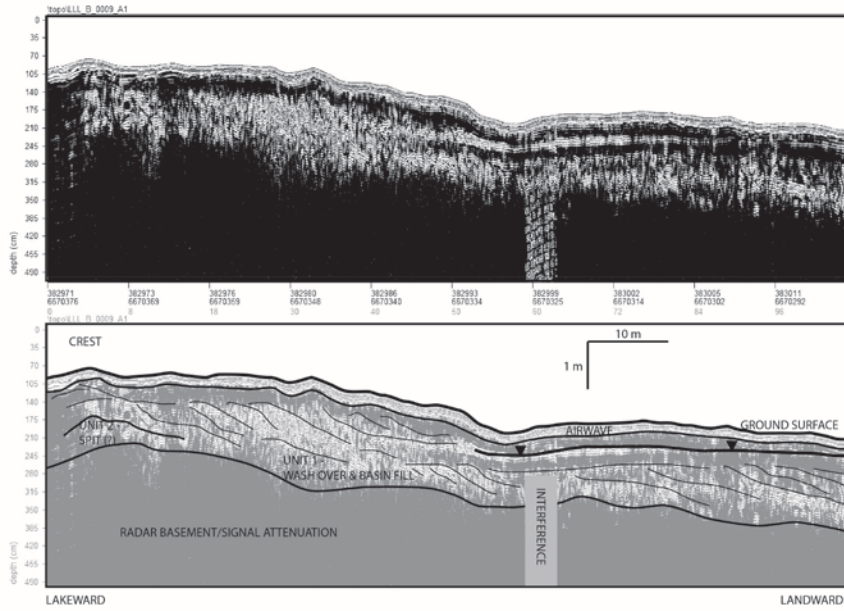

Formatted: Font: Times New Roman

Formatted: Font: Times New Roman

596

597 **Figure 2a**

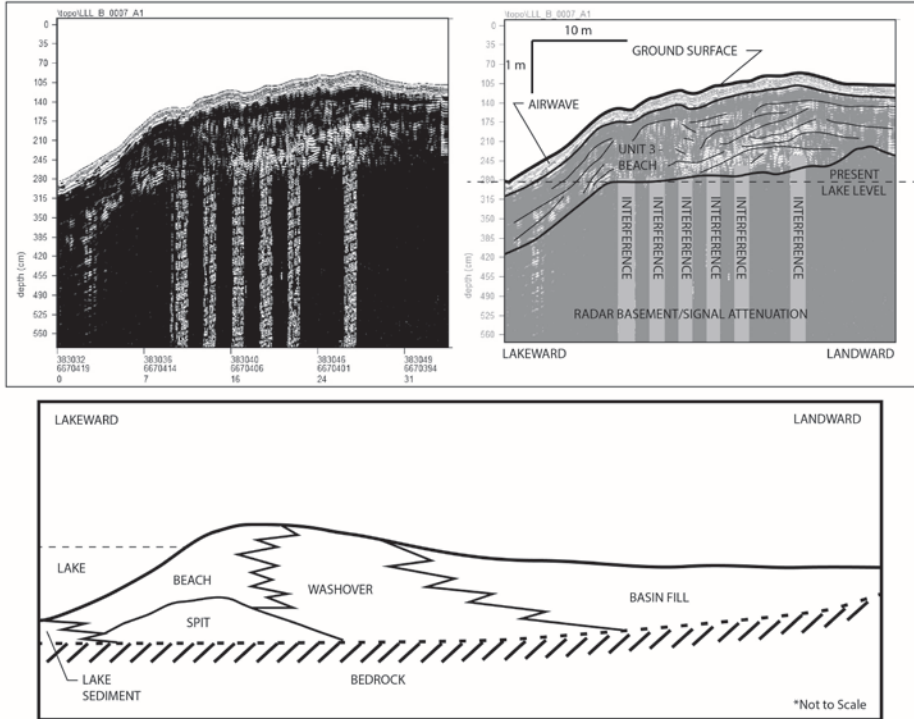

Formatted: Font: Times New Roman

Formatted: Font: Times New Roman

598

599 **Figure 2b**

600



Formatted: Font: Times New Roman

Formatted: Font: Times New Roman

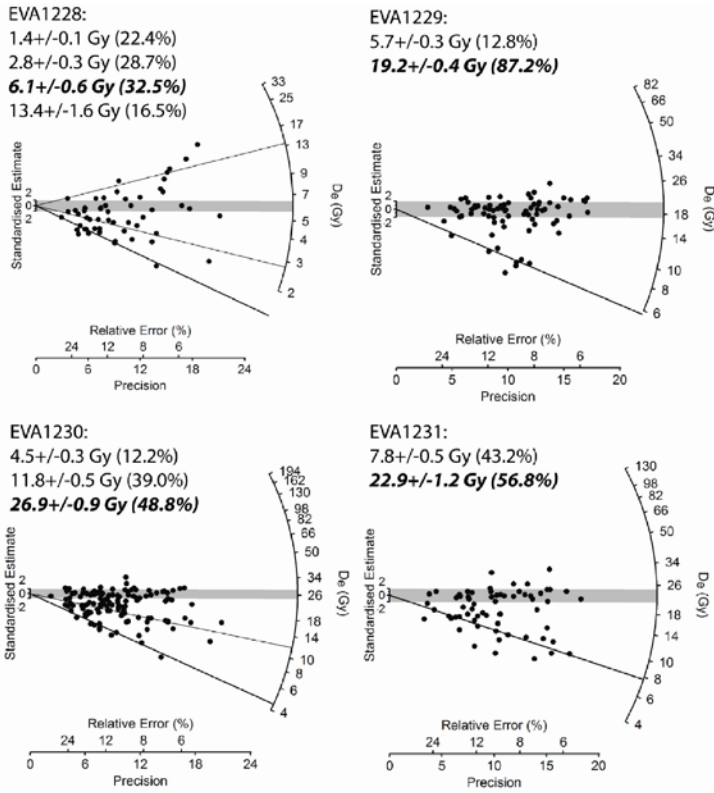

601

602 **Figure 3**

603

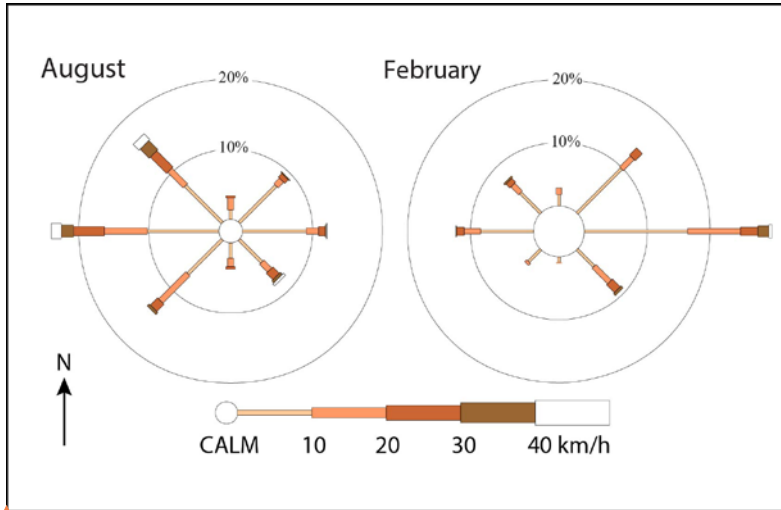

Figure 4

604  
605  
606

Formatted: Font: Times New Roman

Formatted: Font: Times New Roman
