# Supplementary material for: Wind regimes during the Last Glacial Maximum and early Holocene: evidence from Little Llangothlin Lagoon, New England Tableland, eastern Australia
Source: Copernicus journal article supplement (doi:10.5194/cp-2016-41), 2016-04-06
Supplement: Supplementary file [file cp-2016-41-AC2-supplement.pdf]

1 **Supplementary Information Figure Legends**

2 ~~**Table S1.** Overdispersion values based on dose distributions from the LLL OSL samples.~~

3 ~~**Table S2.** Results from the Finite Mixture Modelling. The dominant age populations used for~~  
4 ~~age calculation are highlighted in italics; the resulting ages for the dominant and second major~~  
5 ~~age populations are also given for comparison.~~

6  
7 ~~**Figure S1.** Cumulative particle size curves for sediment samples from LL1 (orange), LL2 (blue),~~  
8 ~~LL3 (green) and LL4 (purple). The second number gives sample depth. For location of cores~~  
9 ~~see Figure 1.~~

10 ~~**Figure S2.** Results of the preheat plateau test on single aliquots of the Lake Little Llangothlin~~  
11 ~~sample L-EVA1231 (field code LL4). There does not appear to be a dependence of equivalent~~  
12 ~~dose with preheat temperature, although more inter-aliquot scatter was observed for the preheat~~  
13 ~~temperature of 280°C. Therefore a higher preheat temperature (260°C) was chosen for~~  
14 ~~subsequent SAR measurements. The cutheat temperature was 220°C.~~

15 ~~**Figure S3.** Dose recovery test results for L-EVA1228, illustrated as a radial plot. The black line~~  
16 ~~corresponds to the administered dose and the shaded line to 2σ on either side of the central age.~~

17  
18 ~~**Table S1.** Overdispersion values based on dose distributions from the LLL OSL samples.~~

19 ~~**Table S2.** Results from the Finite Mixture Modelling. The dominant age populations used for~~  
20 ~~age calculation are highlighted in italics; the resulting ages for the dominant and second major~~  
21 ~~age populations are also given for comparison.~~

22  
23 ~~**Table S1.** Results of the Finite Mixture Modelling. The dominant age populations used for age~~  
24 ~~calculation are highlighted in italics.~~

25

Formatted: Font: Not Bold

26 **Supporting Information Legends (File S1)**

27 **Table S1.** Overdispersion values based on dose distributions from the LLL OSL samples.

| Sample code        | Overdispersion (%) |
|--------------------|--------------------|
| L-EVA1228<br>(LL1) | 79.9               |
| L-EVA1229<br>(LL2) | 44.4               |
| L-EVA1230<br>(LL3) | 63.9               |
| L-EVA123<br>(LL4)  | 61.4               |

28

29

30 **Table S2.** Results from the Finite Mixture Modelling. The dominant age populations used for  
 31 age calculation are highlighted in italics; the resulting ages for the dominant and second major  
 32 age populations are also given for comparison.

| Sample code        | Number of components | De (Gy)                                          | % population                        | Age (ka)                                                 | BIC |
|--------------------|----------------------|--------------------------------------------------|-------------------------------------|----------------------------------------------------------|-----|
| L-EVA1228<br>(LL1) | 4                    | 1.4±0.1<br>2.8±0.3<br><i>6.1±0.6</i><br>13.4±1.6 | 22.4<br>28.7<br><i>32.5</i><br>16.5 | 1.2 ± 0.1<br>2.3 ± 0.3<br><i>5.1 ± 0.5</i><br>11.1 ± 1.6 | 155 |
| L-EVA1229<br>(LL2) | 2                    | 5.7±0.3<br><i>19.2±0.4</i>                       | 12.8<br><i>87.2</i>                 | 5.6 ± 0.5<br><i>18.9 ± 1.2</i>                           | 101 |
| L-EVA1230<br>(LL3) | 3                    | 4.5±0.3<br>11.8±0.5<br><i>26.9±0.9</i>           | 12.2<br>39.0<br><i>48.8</i>         | 9.1 ± 0.7<br><i>20.6 ± 1.4</i>                           | 234 |
| L-EVA1231<br>(LL4) | 2                    | 7.8±0.5<br><i>22.9±1.2</i>                       | 43.2<br><i>56.8</i>                 | 8.0 ± 0.7<br><i>23.4 ± 1.8</i>                           | 128 |

33

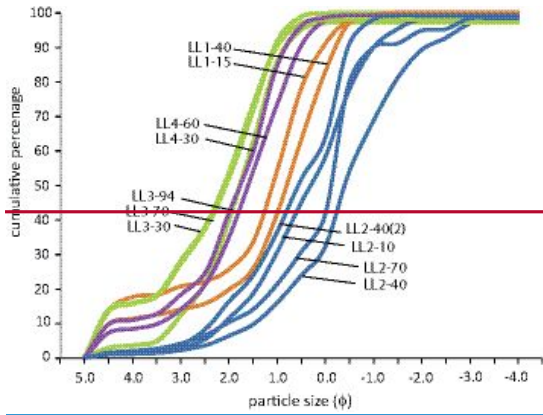

34

35

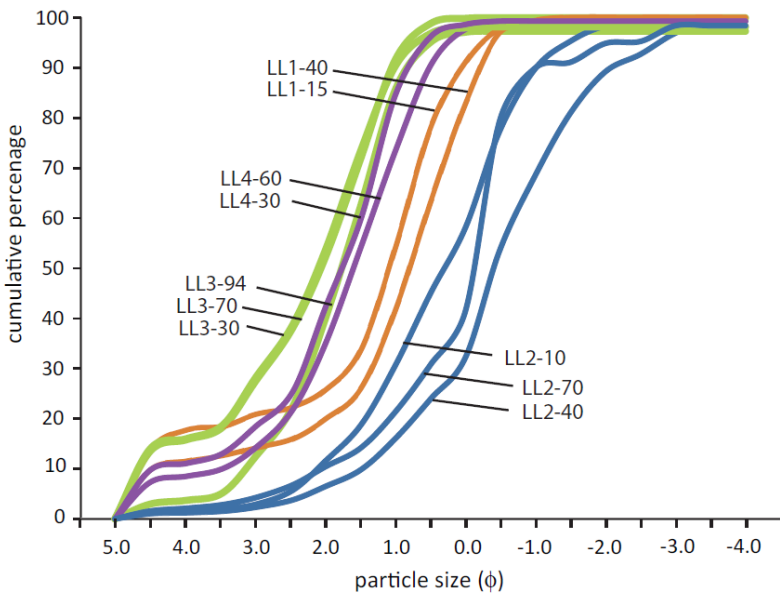

36

37 **Figure S1.** Cumulative particle size curves for sediment samples from LL1 (orange), LL2 (blue),

38 LL3 (green) and LL4 (purple). The second number gives sample depth. For location of cores

39 see Figure 1.

40  
41  
42

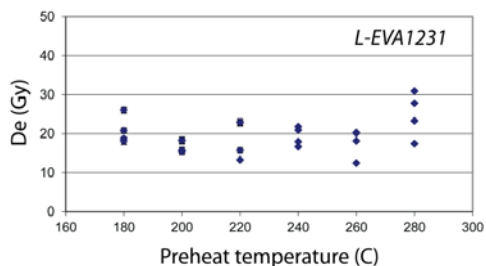

43  
44  
45  
46  
47  
48  
49  
50

**Figure S21.** Results of the preheat plateau test on single aliquots of the Lake Little Llangothlin sample L-EVA1231 (field code LL4). There does not appear to be a dependence of equivalent dose with preheat temperature, although more inter-aliquot scatter was observed for the preheat temperature of 280°C. Therefore a higher preheat temperature (260°C) was chosen for subsequent SAR measurements; the cutheat temperature was 220°C.

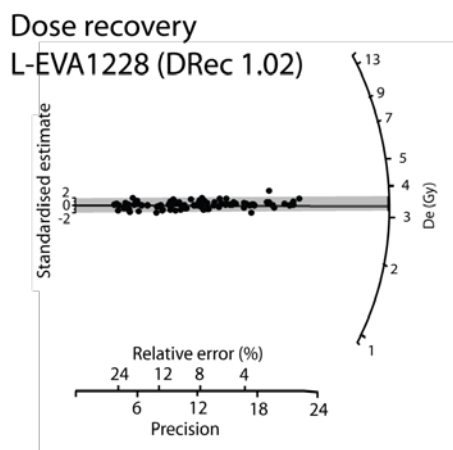

51  
52  
53

**Figure S32.** Dose recovery test results for L-EVA1228, illustrated as a radial plot. The black line corresponds to the administered dose and the shaded line to 2σ on either side of the central age.

54  
55  
56  
57 Supplementary Information - References  
58  
59 Botter-Jensen, L., Bulur, E., Duller, G.A.T., Murray, A.S., 2000. Advances in luminescence  
60 instrument systems. *Radiation Measurements* 32, 523-528.  
61 Bowler, J.M., 1968. Australian landform example no.11: lunette. *Australian Geographer* 10, 402-  
62 404.  
63 Bowler, J.M., 1973. Clay dunes: their occurrence, formation and environmental significance.  
64 *Earth Science Reviews* 9, 315-338.  
65 Bowler, J.M., 1983. Lunettes as indices of hydrologic change: A review of the Australian  
66 evidence. *Proceedings of the Royal Society of Victoria* 95, 147-168.  
67 Fitzsimmons, K.E., Stern, N., Murray-Wallace, C.V., 2014. Depositional history and  
68 archaeology of the central Lake Mungo lunette, Willandra Lakes, southeast Australia. *Journal of*  
69 *Archaeological Science* 41, 349-364.  
70 Murray, A.S., Wintle, A.G., 2000. Luminescence dating of quartz using an improved single-  
71 aliquot regenerative-dose protocol. *Radiation Measurements* 32, 57-73.  
72 Murray, A.S., Wintle, A.G., 2003. The single aliquot regenerative dose protocol: potential for  
73 improvements in reliability. *Radiation Measurements* 37, 377-381.  
74 Prescott, J.R., Hutton, J.T., 1994. Cosmic ray contributions to dose rates for luminescence and  
75 ESR dating: Large depths and long term variations. *Radiation Measurements* 23, 497-500.  
76  
77
